# Supplementary material for: Correlation of Intraoperative 5-ALA-Induced Fluorescence Intensity and Preoperative 11C-Methionine PET Uptake in Glioma Surgery
Source: MDPI journal article supplement (doi:10.3390/cancers14061449), 2022-03-11
Supplement: s1 [file s1]

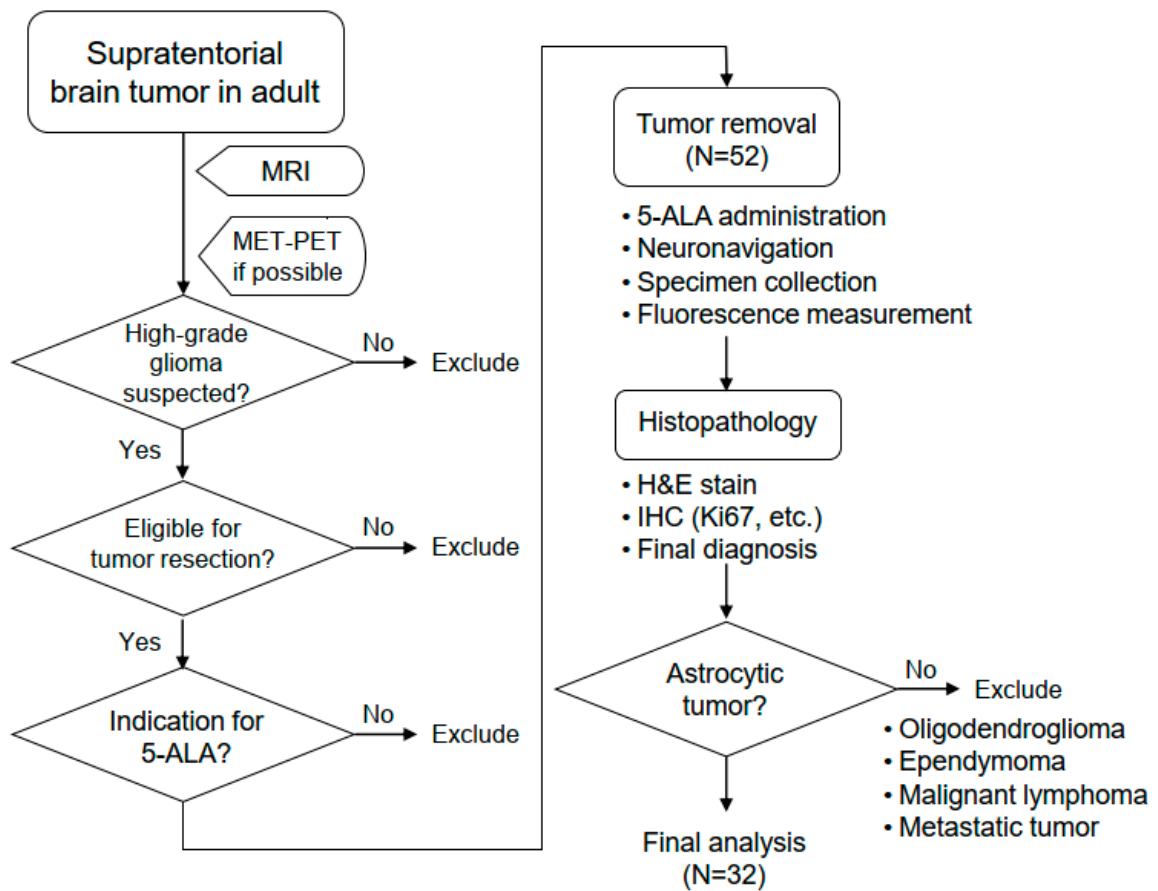

**Supplementary Figure S1.** Flow diagram showing the case selection process. Adult patients with suspected malignant brain tumors in supratentorial regions were subject to imaging evaluations. In those eligible for surgical resection using 5-ALA, intraoperative fluorescence intensity was measured ex vivo. The final analysis included only astrocytic tumors.
